# Supplementary material for: Assessing biosynthetic potential of agricultural groundwater through metagenomic sequencing: A diverse anammox community dominates nitrate-rich groundwater
Source: PubMed Central journal article supplement (PMC5383146; doi:10.1371/journal.pone.0174930), 2017-04-06

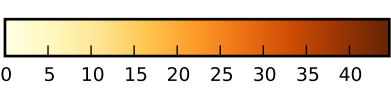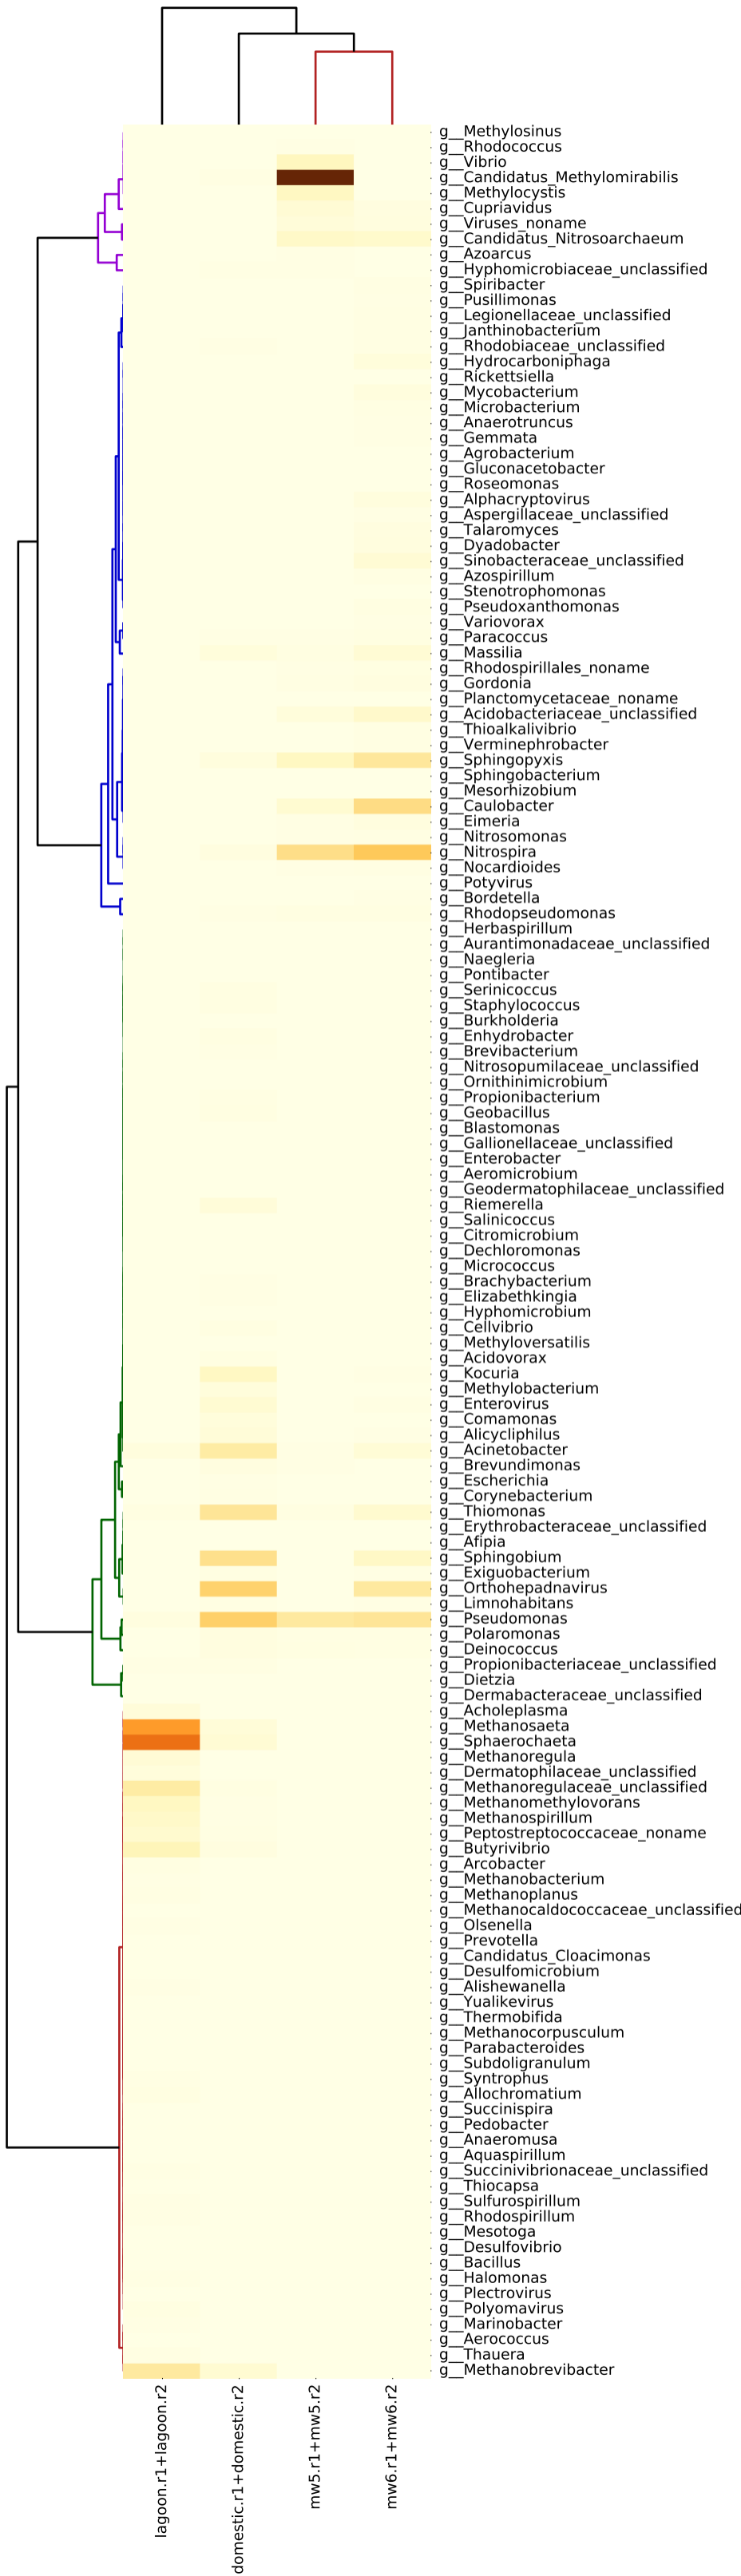

Supplement: pone.0174930.s005.pdf [file pone.0174930.s005.pdf]
