# Supplementary material for: Assessing biosynthetic potential of agricultural groundwater through metagenomic sequencing: A diverse anammox community dominates nitrate-rich groundwater
Source: PLoS One. 2017 Apr 6;12(4):e0174930. doi: 10.1371/journal.pone.0174930 (PMC5383146; doi:10.1371/journal.pone.0174930)
Supplement: S1 Table — (XLSX) [file pone.0174930.s006.xlsx]

## Sheet: Sheet1
bin ID	top taxonomic call	%contigs w top tax call	runner up taxonomic call	%contigs w runner up tax call	median contig coverage (RPKM)	total bin size (bp)	%GC	longest contig (bp)	# of contigs	# of predicted genes	N50	coding density	distribution of the # of 111 single copy marker genes:	0	1	2	3	4	5+	Completeness	Contamination	Strain heterogeneity
MW5-01	archaeon GW2011_AR11	0.174	archaeon GW2011_AR3	0.13	26.8	1647473	0.461308	85567	94	1701	22298	0.870588		77	34	0	0	0	0	30.63	0	0
MW5-02	archaeon GW2011_AR3	0.15	archaeon GW2011_AR15	0.12	4.5	1238050	0.44758	42262	87	1353	19328	0.926903		77	34	0	0	0	0	30.63	0	0
MW5-03	archaeon GW2011_AR3	0.268	archaeon GW2011_AR11	0.232	10.9	1451563	0.4484	305308	16	1664	133467	0.919044		76	35	0	0	0	0	31.53	0	0
MW5-04	archaeon GW2011_AR11	0.322	archaeon GW2011_AR3	0.103	4.3	1186445	0.396677	54397	115	1435	11455	0.914854		77	33	1	0	0	0	30.63	0.9	0
MW5-06	archaeon GW2011_AR16	0.169	Methanosarcina siciliae HI350	0.085	14	1443730	0.377147	284015	17	1662	191720	0.921191		76	35	0	0	0	0	31.53	0	0
MW5-09	archaeon GW2011_AR3	0.166	archaeon GW2011_AR11	0.14	4.6	1111093	0.445361	54803	78	1361	18579	0.899829		78	33	0	0	0	0	29.73	0	0
MW5-10	archaeon GW2011_AR4	0.103	archaeon GW2011_AR3	0.087	4.6	1195414	0.472558	61831	84	1365	18546	0.898226		80	30	1	0	0	0	27.93	0.9	100
MW5-11	archaeon GW2011_AR11	0.151	archaeon GW2011_AR4	0.093	4	1144190	0.465626	56296	93	1287	15072	0.884529		75	36	0	0	0	0	32.43	0	0
MW5-12_2	archaeon GW2011_AR5	0.518	archaeon GW2011_AR3	0.041	4.9	880039	0.447076	48260	58	1119	19549	0.897493		84	26	1	0	0	0	24.32	0.9	0
MW5-13	marine sediment metagenome	0.156	Candidatus Omnitrophus sp. SKK-01	0.053	4.5	2621710	0.416989	95713	151	2625	24451	0.9468		10	100	1	0	0	0	90.99	0.9	0
MW5-15	marine sediment metagenome	0.156	Dehalococcoidia bacterium SCGC AB-539-J10	0.089	2.7	924681	0.530207	20446	143	1040	6120	0.898296		48	63	0	0	0	0	56.76	0	0
MW5-17	Candidatus Methylomirabilis oxyfera	0.529	cellular organisms	0.02	5.8	2733247	0.589473	128287	107	2841	37739	0.876719		5	103	3	0	0	0	95.5	2.7	0
MW5-20	Parcubacteria (Uhrbacteria) bacterium GW2011_GWA2_52_8d	0.234	Uhrbacteria	0.23	3.1	727890	0.575293	34672	77	811	11304	0.915854		29	82	0	0	0	0	73.87	0	0
MW5-23	Candidatus Magnetomorum sp. HK-1	0.034	Beggiatoa sp. PS	0.034	3.4	700773	0.5719	28164	104	603	6607	0.874461		100	11	0	0	0	0	9.91	0	0
MW5-24	Planktothrix agardhii	0.093	Pseudoxanthomonas sp. Root630	0.056	4.1	518458	0.526828	45971	60	432	9946	0.864298		110	0	1	0	0	0	0.9	0.9	0
MW5-32	uncultured bacterium (gcode 4)	0.117	Berkelbacteria bacterium GW2011_GWE1_39_12	0.117	5	893697	0.456942	59583	51	913	25307	0.875414		15	95	1	0	0	0	86.49	0.9	0
MW5-33	Microgenomates	0.325	cellular organisms	0.225	15.2	1127108	0.405563	423501	10	1154	349088	0.914006		25	86	0	0	0	0	77.48	0	0
MW5-36	Parcubacteria bacterium GW2011_GWA1_49_26	0.218	Parcubacteria bacterium GW2011_GWC1_38_6	0.091	5.3	586911	0.476169	77530	31	698	25354	0.918575		22	89	0	0	0	0	80.18	0	0
MW5-39	Parcubacteria (Jorgensenbacteria) bacterium GW2011_GWA1_48_11	0.131	Parcubacteria bacterium GW2011_GWA1_59_11	0.102	11	965870	0.531281	84478	37	1039	39524	0.884677		24	87	0	0	0	0	78.38	0	0
MW5-40	unclassified Parcubacteria	0.119	Parcubacteria (Giovannonibacteria) bacterium GW2011_GWF2_42_19	0.105	27.45	738670	0.505862	51322	42	787	22985	0.869808		24	87	0	0	0	0	78.38	0	0
MW5-44	Parcubacteria bacterium GW2011_GWA2_45_30	0.629	Parcubacteria bacterium GW2011_GWA2_42_14	0.063	12.7	1231418	0.448413	117639	40	1279	50124	0.86344		24	87	0	0	0	0	78.38	0	0
MW5-48	unclassified Parcubacteria	0.102	Parcubacteria (Azambacteria) bacterium GW2011_GWA1_44_9	0.089	7.65	1172749	0.474256	70341	74	1269	20466	0.87463		24	87	0	0	0	0	78.38	0	0
MW5-50_2	unclassified Parcubacteria	0.177	Parcubacteria	0.109	18.6	561949	0.444124	35029	61	616	9971	0.913647		38	73	0	0	0	0	65.77	0	0
MW5-51	Parcubacteria	0.277	Parcubacteria bacterium GW2011_GWC1_38_6	0.106	9.1	544493	0.408982	117108	12	559	83169	0.905453		21	90	0	0	0	0	81.08	0	0
MW5-52	Parcubacteria	0.224	Wolfebacteria	0.106	5.5	699644	0.419869	76282	27	751	32060	0.909545		21	88	2	0	0	0	81.08	1.8	0
MW5-53	Parcubacteria bacterium GW2011_GWC2_32_10	0.3	Parcubacteria bacterium GW2011_GWA2_37_10	0.18	8.2	814997	0.393435	136754	15	839	73368	0.90563		20	90	1	0	0	0	81.98	0.9	0
MW5-56	uncultured bacterium (gcode 4)	0.167	Levybacteria	0.155	4	1281706	0.432924	35798	135	1379	12740	0.892574		37	73	1	0	0	0	66.67	0.9	0
MW5-59_1	Candidatus Jettenia caeni	0.272	Candidatus Brocadia sinica JPN1	0.239	2.4	1262530	0.376533	27571	178	1255	7256	0.885948		60	50	1	0	0	0	45.95	0.9	0
MW5-59_2	Candidatus Jettenia caeni	0.291	Candidatus Brocadia sinica JPN1	0.184	48	1418796	0.402296	41308	224	1534	6148	0.886174		52	59	0	0	0	0	53.15	0	0
MW5-63_2	Levybacteria	0.158	uncultured bacterium (gcode 4)	0.13	58.6	796372	0.398958	86308	43	885	22436	0.944682		25	85	1	0	0	0	77.48	0.9	0
MW5-70_2	Levybacteria	0.135	uncultured bacterium (gcode 4)	0.111	58.8	936817	0.39276	86308	51	1014	22436	0.947301		25	85	1	0	0	0	77.48	0.9	0
MW5-74	Bacteria	0.566	Microgenomates (Daviesbacteria) bacterium GW2011_GWA2_38_17	0.074	4.3	696615	0.401064	69586	43	771	18659	0.92535		32	79	0	0	0	0	71.17	0	0
MW5-75_1	Bacteria	0.25	cellular organisms	0.139	7	1110649	0.415319	170940	31	1191	92210	0.929509		27	80	4	0	0	0	75.68	3.6	50
MW5-75_2	Bacteria	0.333	uncultured bacterium (gcode 4)	0.104	13.3	859957	0.411932	134278	25	925	52826	0.936692		25	80	6	0	0	0	77.48	5.41	0
MW5-76_2	Bacteria	0.509	Microgenomates (Daviesbacteria) bacterium GW2011_GWC2_40_12	0.16	6.75	974916	0.393829	101857	30	1061	43898	0.91628		34	75	2	0	0	0	69.37	1.8	0
