# Supplementary material for: Assessing biosynthetic potential of agricultural groundwater through metagenomic sequencing: A diverse anammox community dominates nitrate-rich groundwater
Source: PLoS One. 2017 Apr 6;12(4):e0174930. doi: 10.1371/journal.pone.0174930 (PMC5383146; doi:10.1371/journal.pone.0174930)
Supplement: S3 Table — (XLSX) [file pone.0174930.s008.xlsx]

## Sheet: Sheet1
bin ID	top taxonomic call	%contigs w top tax call	runner up taxonomic call	%contigs w runner up tax call	median contig coverage (RPKM)	total bin size (bp)	%GC	longest contig (bp)	# of contigs	# of predicted genes	N50	coding density	distribution of the # of 111 single copy marker genes:	0	1	2	3	4	5+	Completeness	Contamination	Strain heterogeneity	Notes	in general, bins with high contamination have been removed. however, specific bins that we think may be valuable to other researchers after more filtering have been left in.
DOM-01	Domibacillus enclensis	0.459	Domibacillus robiginosus	0.151	20.9	4020846	0.45542	81760	214	4128	27212	0.874744		7	94	10	0	0	0	93.69	9.01	10
DOM-02	unclassified Parcubacteria	0.102	Uhrbacteria	0.09	2.1	364323	0.492892	14591	57	394	6492	0.921347		69	42	0	0	0	0	37.84	0	0
DOM-03	Candidatus Brocadia sinica JPN1	0.2	Candidatus Jettenia caeni	0.174	3.2	2341156	0.500445	52524	171	2294	17219	0.848856		10	96	5	0	0	0	90.99	4.5	0
DOM-05	Lamprocystis purpurea	0.075	Thiocystis violascens (strain ATCC 17096 / DSM 198 / 6111)	0.068	3.4	1942763	0.640459	43739	276	1949	7042	0.863357		29	82	0	0	0	0	73.87	0	0
DOM-06	archaeon GW2011_AR9	0.242	archaeon GW2011_AR3	0.049	2.8	1544758	0.447916	23755	230	1857	6756	0.903223		84	23	3	1	0	0	24.32	4.5	16.67
DOM-07	archaeon GW2011_AR5	0.558	archaeon GW2011_AR10	0.038	2.4	869831	0.446483	21900	125	1189	7043	0.892818		88	15	8	0	0	0	20.72	7.21	0
DOM-08	archaeon GW2011_AR17	0.109	archaeon GW2011_AR20	0.08	2.1	388783	0.470085	19307	62	519	6195	0.920899		97	14	0	0	0	0	12.61	0	0
DOM-09	Bacteroidales bacterium CF	0.502	uncultured bacterium (gcode 4)	0.174	4.7	2062333	0.485038	253464	38	1793	152399	0.959052		11	100	0	0	0	0	90.09	0	0
DOM-13	marine sediment metagenome	0.144	Synechococcus phage S-SKS1	0.096	3.9	105149	0.292899	29834	9	164	14045	0.938735		111	0	0	0	0	0	0	0	0
DOM-14	Chryseobacterium sp. Leaf405	0.146	Riemerella anatipestifer	0.098	2.8	913095	0.334752	20267	135	936	6773	0.900793		62	49	0	0	0	0	44.14	0	0
DOM-15	Candidatus Omnitrophus sp. SKK-01	0.162	marine sediment metagenome	0.155	3.3	1371415	0.421096	45916	111	1276	16176	0.923203		27	81	2	1	0	0	75.68	3.6	80
DOM-17	marine sediment metagenome	0.267	Candidatus Omnitrophus sp. SKK-01	0.096	4.1	2091717	0.404524	152711	98	1883	36512	0.905165		26	81	4	0	0	0	76.58	3.6	75
DOM-18	marine sediment metagenome	0.136	Candidatus Omnitrophus sp. SKK-01	0.111	2.7	1045235	0.436048	34210	108	1148	11580	0.956061		39	71	1	0	0	0	64.86	0.9	100
DOM-20	Sphingomonas sp. Ag1	0.619	unknown	0.033	8.4	4639849	0.660889	182742	202	4637	38128	0.905499		6	103	2	0	0	0	94.59	1.8	0
DOM-21	Nitrospira moscoviensis	0.736	Nitrospira defluvii	0.165	7.3	7619782	0.58877	277464	229	7884	64594	0.891116		5	5	94	5	2	0	95.5	99.1*	11.57	included despite CheckM detecting high contamination because 90% of the contigs map to Nitrospira
DOM-23	Aquabacterium parvum	0.25	Aquabacterium sp. NJ1	0.13	3.1	2792956	0.62819	39022	397	2944	6827	0.901396		37	60	13	1	0	0	66.67	13.51	25
DOM-5	Candidatus Methylomirabilis oxyfera	0.087	marine sediment metagenome	0.035	3.7	4417683	0.652133	55420	526	4973	9109	0.924915		13	40	54	2	2	0	88.29	57.6*	11.11	included despite CheckM detecting high contamination because clustering with other Methylomirabilis-like bins may dramatically improve purity.
DOM-26	Candidatus Methylomirabilis oxyfera	0.058	marine sediment metagenome	0.04	3.7	2039912	0.668737	22178	290	2307	7237	0.921187		41	63	7	0	0	0	63.06	6.31	28.57
DOM-31	unclassified Parcubacteria	0.137	Microgenomates bacterium GW2011_GWA2_47_8	0.059	3.1	1084881	0.471277	21405	188	1295	5525	0.893473		53	44	13	1	0	0	52.25	13.51	0
DOM-32	unclassified Microgenomates	0.121	Microgenomates	0.063	2	295869	0.467156	10293	54	370	5574	0.95616		99	12	0	0	0	0	10.81	0	0
DOM-34	Bacteroidales bacterium CF	0.547	uncultured bacterium (gcode 4)	0.19	5.8	1947993	0.483486	198807	54	1750	63417	0.957122		15	96	0	0	0	0	86.49	0	0
DOM-40	Candidatus Jettenia caeni	0.181	Candidatus Brocadia sinica JPN1	0.145	4.4	2341753	0.491838	50637	288	2447	8302	0.892588		37	61	13	0	0	0	66.67	11.71	15.38
