# Supplementary material for: Assessing biosynthetic potential of agricultural groundwater through metagenomic sequencing: A diverse anammox community dominates nitrate-rich groundwater
Source: PLoS One. 2017 Apr 6;12(4):e0174930. doi: 10.1371/journal.pone.0174930 (PMC5383146; doi:10.1371/journal.pone.0174930)
Supplement: S4 Table — (XLSX) [file pone.0174930.s009.xlsx]

## Sheet: Sheet1
bin ID	top taxonomic call	%contigs w top tax call	runner up taxonomic call	%contigs w runner up tax call	median contig coverage (RPKM)	total bin size (bp)	%GC	longest contig (bp)	# of contigs	# of predicted genes	N50	coding density	distribution of the # of 111 single copy marker genes:	0	1	2	3	4	5+
LAG-01	Prolixibacter bellariivorans	0.06	bacterium L21-Spi-D4	0.041	3.5	2395514	0.4808	7921	510	2336	4061	0.949221		27	82	2	0	0	0
LAG-02	Youngiibacter fragilis 232.1	0.2	Proteiniclasticum ruminis	0.084	2.4	2528992	0.499231	7956	544	2578	4000	0.825358		36	69	4	2	0	0
LAG-03	uncultured bacterium (gcode 4)	0.574	marine sediment metagenome	0.013	1.6	2293450	0.40423	7999	460	2356	4878	0.948458		34	75	2	0	0	0
LAG-04	Flavobacteriales bacterium BRH_c54	0.063	bacterium L21-Spi-D4	0.055	2.6	2070015	0.401245	7933	465	2040	4000	0.926256		12	85	13	1	0	0
LAG-05	uncultured bacterium (gcode 4)	0.624	Parcubacteria (Moranbacteria) bacterium GW2011_GWE2_35_2-	0.064	3	941511	0.394628	7769	212	995	4000	0.88631		18	89	4	0	0	0
LAG-06	Acetivibrio cellulolyticus	0.029	Clostridium stercorarium subsp. stercorarium (strain ATCC 35414 / DSM 8532 / NCIMB 11754)	0.026	1.6	1976836	0.365002	7965	406	2110	4715	0.933385		13	91	6	1	0	0
LAG-07	marine sediment metagenome	0.275	Clostridium beijerinckii	0.055	1.6	374436	0.381731	7649	80	609	4000	0.924222		107	4	0	0	0	0
LAG-08	marine sediment metagenome	0.036	Yersinia enterocolitica	0.024	2.3	1926622	0.300735	7891	430	2037	4000	0.914774		11	86	13	1	0	0
LAG-09	archaeon GW2011_AR10	0.262	archaeon GW2011_AR21	0.049	2.5	1563506	0.299121	7866	313	1879	5088	0.929938		81	7	16	7	0	0
LAG-10	Acholeplasma palmae	0.165	Acholeplasma hippikon	0.093	3.5	2039688	0.335406	7958	407	2284	4960	0.926526		45	28	33	5	0	0
LAG-11	Candidatus Omnitrophus sp. SKK-01	0.273	marine sediment metagenome	0.163	2.9	2229449	0.536925	7953	516	2572	4000	0.957508		7	85	17	2	0	0
LAG-12	Coprobacillus sp. CAG:826	0.47	Acholeplasma palmae	0.034	2	945969	0.378162	7879	205	1042	4000	0.917523		16	92	3	0	0	0
LAG-13	Coprobacillus sp. CAG:826	0.673	Clostridium sp. CAG:288	0.04	2	939058	0.381137	7925	213	1030	4000	0.923645		14	96	1	0	0	0
LAG-14	Coprobacillus sp. CAG:826	0.653	Acholeplasma brassicae	0.05	2.1	1128804	0.409257	7892	259	1252	4000	0.937838		10	96	5	0	0	0
LAG-15	Coprobacillus sp. CAG:698	0.36	Acholeplasma brassicae	0.064	1.6	1077641	0.325428	7970	209	1110	5201	0.934878		53	47	11	0	0	0
LAG-19	Methanosaeta concilii (strain ATCC 5969 / DSM 3671 / JCM 10134 / NBRC 103675 / OCM 69 / GP-6)	0.524	Methanosaeta thermophila (strain DSM 6194 / JCM 14653 / NBRC 101360 / PT)	0.105	1.3	982509	0.5244	7990	191	1201	5098	0.869724		97	13	1	0	0	0
LAG-20	Verrucomicrobia bacterium L21-Fru-AB	0.15	marine sediment metagenome	0.047	1.9	1178972	0.652536	7931	226	1098	5326	0.917737		66	45	0	0	0	0
LAG-21	Thiocapsa marina 5811	0.368	Thiocystis violascens (strain ATCC 17096 / DSM 198 / 6111)	0.083	2.2	3299649	0.642354	7954	671	3448	4660	0.883213		23	86	2	0	0	0
LAG-22	marine sediment metagenome	0.092	candidate division Zixibacteria bacterium RBG-1	0.034	1.9	2132001	0.64981	7961	432	1970	4923	0.88394		62	47	2	0	0	0
LAG-23	marine sediment metagenome	0.089	Verrucomicrobia bacterium L21-Fru-AB	0.029	2	1866650	0.612111	7980	369	1895	4978	0.866373		48	61	2	0	0	0
LAG-24	Cloacimonas acidaminovorans (strain Evry)	0.536	Candidatus Cloacimonas	0.102	1.8	2125039	0.487374	7993	416	2052	5108	0.917302		64	36	10	1	0	0
LAG-25	Lamprocystis purpurea	0.075	Thiocapsa marina 5811	0.052	7.2	3742110	0.614441	7963	736	3866	5063	0.866541		60	37	10	3	1	0
LAG-26	Thermanaerothrix daxensis	0.139	Anaerolinea thermophila (strain DSM 14523 / JCM 11388 / NBRC 100420 / UNI-1)	0.131	3.6	1932575	0.483595	7951	391	2004	4905	0.91479		24	74	13	0	0	0
LAG-27	Cloacimonas acidaminovorans (strain Evry)	0.554	Candidatus Cloacimonas sp. SDB	0.072	1.3	722932	0.554341	7966	140	714	5084	0.906033		78	32	1	0	0	0
LAG-29	Synergistes sp. 3_1_syn1	0.454	Synergistes jonesii	0.205	3.6	2275279	0.472173	7995	456	2419	5003	0.913413		59	24	27	1	0	0
LAG-30	Anaerovorax odorimutans	0.177	Firmicutes bacterium CAG:145	0.118	1.3	629156	0.567176	7995	122	729	5091	0.932673		50	61	0	0	0	0
LAG-1	Anaerovorax odorimutans	0.255	Firmicutes bacterium CAG:145	0.113	1.2	314676	0.431317	7798	61	356	5095	0.926178		85	25	1	0	0	0
LAG-32	marine sediment metagenome	0.348	Microgenomates (Woesebacteria) bacterium GW2011_GWB1_39_12	0.116	1.7	247618	0.499087	7817	51	343	4492	0.928878		109	2	0	0	0	0
LAG-34	Faecalibacterium sp. CAG:74	0.16	Caldicoprobacter oshimai	0.038	1.7	2184681	0.57044	7976	431	2306	5008	0.90839		21	49	38	3	0	0
LAG-35	Faecalibacterium sp. CAG:74	0.134	cellular organisms	0.034	1.4	1049627	0.578633	7976	204	1104	5128	0.902873		57	50	4	0	0	0
LAG-36	marine sediment metagenome	0.203	Ralstonia sp. PBA	0.087	1.65	290536	0.482343	7820	60	470	4596	0.876976		109	2	0	0	0	0
LAG-37	Faecalibacterium sp. CAG:74	0.19	Caldicoprobacter oshimai	0.051	2.1	1135054	0.562864	7934	227	1202	4907	0.913245		38	70	3	0	0	0
LAG-38	Bacteroidales bacterium CF	0.473	uncultured bacterium (gcode 4)	0.12	5.1	4774538	0.480356	7980	1107	4915	4000	0.958287		6	20	74	9	2	0
LAG-9	Bacteroidales bacterium CF	0.492	uncultured bacterium (gcode 4)	0.111	25.3	1762086	0.501535	7962	408	1841	4000	0.97148		38	65	7	1	0	0
LAG-41	Smithella sp. SDB	0.166	Smithella sp. F21	0.165	2.5	7564528	0.511644	7970	1641	8532	4000	0.905545		6	8	43	32	18	4
LAG-42	Mesotoga prima MesG1.Ag.4.2	0.06	Kosmotoga pacifica	0.058	1.3	1200635	0.495603	7855	231	1260	5278	0.920605		58	52	1	0	0	0
LAG-43	Anaerovorax odorimutans	0.415	Firmicutes bacterium CAG:145	0.106	2.9	1395259	0.453025	7745	306	1512	4000	0.929976		52	56	3	0	0	0
LAG-44	marine sediment metagenome	0.074	bacterium L21-Spi-D4	0.036	2.2	2653755	0.35854	7977	558	2705	4169	0.912305		12	78	20	1	0	0
LAG-45	marine sediment metagenome	0.257	Methanohalobium evestigatum (strain DSM 3721 / OCM 161 / Z-7303)	0.057	3.9	473983	0.383999	7849	105	599	4000	0.9129		108	3	0	0	0	0
LAG-46	Bacteroides	0.157	Paludibacter propionicigenes (strain DSM 17365 / JCM 13257 / WB4)	0.067	1.2	596117	0.346281	7937	114	584	5189	0.945407		89	21	1	0	0	0
LAG-48	Ruminococcaceae bacterium AE2021	0.38	Ruminococcaceae bacterium AB4001	0.156	1.1	402306	0.392786	7934	75	403	5522	0.934498		95	16	0	0	0	0
LAG-49	Acidaminococcus sp. CAG:917	0.112	Faecalibacterium sp. CAG:1138	0.099	2.6	2007589	0.360187	7953	445	2098	4000	0.89904		17	88	6	0	0	0
LAG-50	Caldisalinibacter kiritimatiensis	0.027	Desulfitobacterium hafniense	0.021	1.4	834705	0.442253	7848	163	878	5176	0.926175		57	52	2	0	0	0
LAG-51	marine sediment metagenome	0.145	Candidatus Omnitrophus sp. SKK-01	0.097	1.6	778942	0.501863	7953	160	879	4682	0.945339		87	24	0	0	0	0
