# Supplementary material for: Assessing biosynthetic potential of agricultural groundwater through metagenomic sequencing: A diverse anammox community dominates nitrate-rich groundwater
Source: PLoS One. 2017 Apr 6;12(4):e0174930. doi: 10.1371/journal.pone.0174930 (PMC5383146; doi:10.1371/journal.pone.0174930)
Supplement: S6 Table — (PDF) [file pone.0174930.s011.pdf]

Table S6: KEGG module coverage b

| pathway | name |
|---------|------|
|---------|------|

| Table S6: KEGG module coverage by water |                              |                                                                                                                                                                                                                                                                                                                                                                                                                                                                                                                                                                                                                                                                                                                                                                                                                                                                                                                                                                                                                                                                                                                                                                                                                                                                                                                                                                                                                                                                                                                                                                                                                                                                                                                                                                                                                                                                                                                                                                                                                                                                                                                                                                                                                                                                                                                                                                                                                                                                                                                                                                                                                                                                                                                                                                                                                                                                                                                                                                                                                                                                                                                                                                                                                                                                                                                                                                                                                                                                                                                                                                                                                                                                                                                                                                                                                                                                                                                                                                                                                                                                                                                                                                                                                                                                                                                                                                                                                                                                                                                                                                                                                                                                                                                                                                                                                                                                                                                                                                                                                                                                                                                                                                                            | domestic<br>mng                                                                                                                                                                                                                                                                                                                                                                                                                                                                                                                                                                                                                                                                                                                                                                                                                                                                                                                                                                                                                                                                                                                                                                                                                                                                                                                                                                                                                                                                                                                                                                                                                                                                                                                                                                                                                                                                                                                                                                                                                                                                                                                                                                                                                                                                                                                                                                                                                                                                                                                                                                                                                                                                                                                                                                                                                                                                                                                                                                                                                                                                                                                                                                                                                                                                                                                                                                                                                                                                                                                                                                                                                                                                                                                                                                                                                                                                                                                                                                                                                                                                                                                                                                                                                                                                                                                                                                                                                                                                                                                                                                                                                                                                                                                                                                                                                                                                                                                                                                                                                                                                                                                                                                                                                                                                                                                                                                                                                                                                                                                                                                                                                                                                                                                                                                                                                                                                                                                                                                                                                                                                                                                                                                                                                                                                                                                                                                                                                                                                                                                                                                                                                                                                                                                                                                                                                                                                                                                                                                                                                                                                                                                                                                                                                                                                                                                                                                                                                                                                                                                                                                                                                                                                                                                                                                                                                                                                                                                                                                                                                                                                                                                                                                                     | mng6 |
|-----------------------------------------|------------------------------|--------------------------------------------------------------------------------------------------------------------------------------------------------------------------------------------------------------------------------------------------------------------------------------------------------------------------------------------------------------------------------------------------------------------------------------------------------------------------------------------------------------------------------------------------------------------------------------------------------------------------------------------------------------------------------------------------------------------------------------------------------------------------------------------------------------------------------------------------------------------------------------------------------------------------------------------------------------------------------------------------------------------------------------------------------------------------------------------------------------------------------------------------------------------------------------------------------------------------------------------------------------------------------------------------------------------------------------------------------------------------------------------------------------------------------------------------------------------------------------------------------------------------------------------------------------------------------------------------------------------------------------------------------------------------------------------------------------------------------------------------------------------------------------------------------------------------------------------------------------------------------------------------------------------------------------------------------------------------------------------------------------------------------------------------------------------------------------------------------------------------------------------------------------------------------------------------------------------------------------------------------------------------------------------------------------------------------------------------------------------------------------------------------------------------------------------------------------------------------------------------------------------------------------------------------------------------------------------------------------------------------------------------------------------------------------------------------------------------------------------------------------------------------------------------------------------------------------------------------------------------------------------------------------------------------------------------------------------------------------------------------------------------------------------------------------------------------------------------------------------------------------------------------------------------------------------------------------------------------------------------------------------------------------------------------------------------------------------------------------------------------------------------------------------------------------------------------------------------------------------------------------------------------------------------------------------------------------------------------------------------------------------------------------------------------------------------------------------------------------------------------------------------------------------------------------------------------------------------------------------------------------------------------------------------------------------------------------------------------------------------------------------------------------------------------------------------------------------------------------------------------------------------------------------------------------------------------------------------------------------------------------------------------------------------------------------------------------------------------------------------------------------------------------------------------------------------------------------------------------------------------------------------------------------------------------------------------------------------------------------------------------------------------------------------------------------------------------------------------------------------------------------------------------------------------------------------------------------------------------------------------------------------------------------------------------------------------------------------------------------------------------------------------------------------------------------------------------------------------------------------------------------------------------------------------------------|-----------------------------------------------------------------------------------------------------------------------------------------------------------------------------------------------------------------------------------------------------------------------------------------------------------------------------------------------------------------------------------------------------------------------------------------------------------------------------------------------------------------------------------------------------------------------------------------------------------------------------------------------------------------------------------------------------------------------------------------------------------------------------------------------------------------------------------------------------------------------------------------------------------------------------------------------------------------------------------------------------------------------------------------------------------------------------------------------------------------------------------------------------------------------------------------------------------------------------------------------------------------------------------------------------------------------------------------------------------------------------------------------------------------------------------------------------------------------------------------------------------------------------------------------------------------------------------------------------------------------------------------------------------------------------------------------------------------------------------------------------------------------------------------------------------------------------------------------------------------------------------------------------------------------------------------------------------------------------------------------------------------------------------------------------------------------------------------------------------------------------------------------------------------------------------------------------------------------------------------------------------------------------------------------------------------------------------------------------------------------------------------------------------------------------------------------------------------------------------------------------------------------------------------------------------------------------------------------------------------------------------------------------------------------------------------------------------------------------------------------------------------------------------------------------------------------------------------------------------------------------------------------------------------------------------------------------------------------------------------------------------------------------------------------------------------------------------------------------------------------------------------------------------------------------------------------------------------------------------------------------------------------------------------------------------------------------------------------------------------------------------------------------------------------------------------------------------------------------------------------------------------------------------------------------------------------------------------------------------------------------------------------------------------------------------------------------------------------------------------------------------------------------------------------------------------------------------------------------------------------------------------------------------------------------------------------------------------------------------------------------------------------------------------------------------------------------------------------------------------------------------------------------------------------------------------------------------------------------------------------------------------------------------------------------------------------------------------------------------------------------------------------------------------------------------------------------------------------------------------------------------------------------------------------------------------------------------------------------------------------------------------------------------------------------------------------------------------------------------------------------------------------------------------------------------------------------------------------------------------------------------------------------------------------------------------------------------------------------------------------------------------------------------------------------------------------------------------------------------------------------------------------------------------------------------------------------------------------------------------------------------------------------------------------------------------------------------------------------------------------------------------------------------------------------------------------------------------------------------------------------------------------------------------------------------------------------------------------------------------------------------------------------------------------------------------------------------------------------------------------------------------------------------------------------------------------------------------------------------------------------------------------------------------------------------------------------------------------------------------------------------------------------------------------------------------------------------------------------------------------------------------------------------------------------------------------------------------------------------------------------------------------------------------------------------------------------------------------------------------------------------------------------------------------------------------------------------------------------------------------------------------------------------------------------------------------------------------------------------------------------------------------------------------------------------------------------------------------------------------------------------------------------------------------------------------------------------------------------------------------------------------------------------------------------------------------------------------------------------------------------------------------------------------------------------------------------------------------------------------------------------------------------------------------------------------------------------------------------------------------------------------------------------------------------------------------------------------------------------------------------------------------------------------------------------------------------------------------------------------------------------------------------------------------------------------------------------------------------------------------------------------------------------------------------------------------------------------------------------------------------------------------------------------------------------------------------------------------------------------------------------------------------------------------------------------------------------------------------------------------------------------------------------------------------------------------------------------------------------------------------------------------------------------------------------------------------|------|
| id                                      | name                         | module                                                                                                                                                                                                                                                                                                                                                                                                                                                                                                                                                                                                                                                                                                                                                                                                                                                                                                                                                                                                                                                                                                                                                                                                                                                                                                                                                                                                                                                                                                                                                                                                                                                                                                                                                                                                                                                                                                                                                                                                                                                                                                                                                                                                                                                                                                                                                                                                                                                                                                                                                                                                                                                                                                                                                                                                                                                                                                                                                                                                                                                                                                                                                                                                                                                                                                                                                                                                                                                                                                                                                                                                                                                                                                                                                                                                                                                                                                                                                                                                                                                                                                                                                                                                                                                                                                                                                                                                                                                                                                                                                                                                                                                                                                                                                                                                                                                                                                                                                                                                                                                                                                                                                                                     |                                                                                                                                                                                                                                                                                                                                                                                                                                                                                                                                                                                                                                                                                                                                                                                                                                                                                                                                                                                                                                                                                                                                                                                                                                                                                                                                                                                                                                                                                                                                                                                                                                                                                                                                                                                                                                                                                                                                                                                                                                                                                                                                                                                                                                                                                                                                                                                                                                                                                                                                                                                                                                                                                                                                                                                                                                                                                                                                                                                                                                                                                                                                                                                                                                                                                                                                                                                                                                                                                                                                                                                                                                                                                                                                                                                                                                                                                                                                                                                                                                                                                                                                                                                                                                                                                                                                                                                                                                                                                                                                                                                                                                                                                                                                                                                                                                                                                                                                                                                                                                                                                                                                                                                                                                                                                                                                                                                                                                                                                                                                                                                                                                                                                                                                                                                                                                                                                                                                                                                                                                                                                                                                                                                                                                                                                                                                                                                                                                                                                                                                                                                                                                                                                                                                                                                                                                                                                                                                                                                                                                                                                                                                                                                                                                                                                                                                                                                                                                                                                                                                                                                                                                                                                                                                                                                                                                                                                                                                                                                                                                                                                                                                                                                                     |      |
| map00010                                | Glycolysis / Gluconeogenesis | M00001<br>M00003<br>M00004<br>M00005<br>M00006<br>M00007<br>M00008<br>M00009<br>M00010<br>M00011<br>M00012<br>M00013<br>M00014<br>M00015<br>M00016<br>M00017<br>M00018<br>M00019<br>M00020<br>M00021<br>M00022<br>M00023<br>M00024<br>M00025<br>M00026<br>M00027<br>M00028<br>M00029<br>M00030<br>M00031<br>M00032<br>M00033<br>M00034<br>M00035<br>M00036<br>M00037<br>M00038<br>M00039<br>M00040<br>M00041<br>M00042<br>M00043<br>M00044<br>M00045<br>M00046<br>M00047<br>M00048<br>M00049<br>M00050<br>M00051<br>M00052<br>M00053<br>M00054<br>M00055<br>M00056<br>M00057<br>M00058<br>M00059<br>M00060<br>M00061<br>M00062<br>M00063<br>M00064<br>M00065<br>M00066<br>M00067<br>M00068<br>M00069<br>M00070<br>M00071<br>M00072<br>M00073<br>M00074<br>M00075<br>M00076<br>M00077<br>M00078<br>M00079<br>M00080<br>M00081<br>M00082<br>M00083<br>M00084<br>M00085<br>M00086<br>M00087<br>M00088<br>M00089<br>M00090<br>M00091<br>M00092<br>M00093<br>M00094<br>M00095<br>M00096<br>M00097<br>M00098<br>M00099<br>M00100<br>M00101<br>M00102<br>M00103<br>M00104<br>M00105<br>M00106<br>M00107<br>M00108<br>M00109<br>M00110<br>M00111<br>M00112<br>M00113<br>M00114<br>M00115<br>M00116<br>M00117<br>M00118<br>M00119<br>M00120<br>M00121<br>M00122<br>M00123<br>M00124<br>M00125<br>M00126<br>M00127<br>M00128<br>M00129<br>M00130<br>M00131<br>M00132<br>M00133<br>M00134<br>M00135<br>M00136<br>M00137<br>M00138<br>M00139<br>M00140<br>M00141<br>M00142<br>M00143<br>M00144<br>M00145<br>M00146<br>M00147<br>M00148<br>M00149<br>M00150<br>M00151<br>M00152<br>M00153<br>M00154<br>M00155<br>M00156<br>M00157<br>M00158<br>M00159<br>M00160<br>M00161<br>M00162<br>M00163<br>M00164<br>M00165<br>M00166<br>M00167<br>M00168<br>M00169<br>M00170<br>M00171<br>M00172<br>M00173<br>M00174<br>M00175<br>M00176<br>M00177<br>M00178<br>M00179<br>M00180<br>M00181<br>M00182<br>M00183<br>M00184<br>M00185<br>M00186<br>M00187<br>M00188<br>M00189<br>M00190<br>M00191<br>M00192<br>M00193<br>M00194<br>M00195<br>M00196<br>M00197<br>M00198<br>M00199<br>M00200<br>M00201<br>M00202<br>M00203<br>M00204<br>M00205<br>M00206<br>M00207<br>M00208<br>M00209<br>M00210<br>M00211<br>M00212<br>M00213<br>M00214<br>M00215<br>M00216<br>M00217<br>M00218<br>M00219<br>M00220<br>M00221<br>M00222<br>M00223<br>M00224<br>M00225<br>M00226<br>M00227<br>M00228<br>M00229<br>M00230<br>M00231<br>M00232<br>M00233<br>M00234<br>M00235<br>M00236<br>M00237<br>M00238<br>M00239<br>M00240<br>M00241<br>M00242<br>M00243<br>M00244<br>M00245<br>M00246<br>M00247<br>M00248<br>M00249<br>M00250<br>M00251<br>M00252<br>M00253<br>M00254<br>M00255<br>M00256<br>M00257<br>M00258<br>M00259<br>M00260<br>M00261<br>M00262<br>M00263<br>M00264<br>M00265<br>M00266<br>M00267<br>M00268<br>M00269<br>M00270<br>M00271<br>M00272<br>M00273<br>M00274<br>M00275<br>M00276<br>M00277<br>M00278<br>M00279<br>M00280<br>M00281<br>M00282<br>M00283<br>M00284<br>M00285<br>M00286<br>M00287<br>M00288<br>M00289<br>M00290<br>M00291<br>M00292<br>M00293<br>M00294<br>M00295<br>M00296<br>M00297<br>M00298<br>M00299<br>M00300<br>M00301<br>M00302<br>M00303<br>M00304<br>M00305<br>M00306<br>M00307<br>M00308<br>M00309<br>M00310<br>M00311<br>M00312<br>M00313<br>M00314<br>M00315<br>M00316<br>M00317<br>M00318<br>M00319<br>M00320<br>M00321<br>M00322<br>M00323<br>M00324<br>M00325<br>M00326<br>M00327<br>M00328<br>M00329<br>M00330<br>M00331<br>M00332<br>M00333<br>M00334<br>M00335<br>M00336<br>M00337<br>M00338<br>M00339<br>M00340<br>M00341<br>M00342<br>M00343<br>M00344<br>M00345<br>M00346<br>M00347<br>M00348<br>M00349<br>M00350<br>M00351<br>M00352<br>M00353<br>M00354<br>M00355<br>M00356<br>M00357<br>M00358<br>M00359<br>M00360<br>M00361<br>M00362<br>M00363<br>M00364<br>M00365<br>M00366<br>M00367<br>M00368<br>M00369<br>M00370<br>M00371<br>M00372<br>M00373<br>M00374<br>M00375<br>M00376<br>M00377<br>M00378<br>M00379<br>M00380<br>M00381<br>M00382<br>M00383<br>M00384<br>M00385<br>M00386<br>M00387<br>M00388<br>M00389<br>M00390<br>M00391<br>M00392<br>M00393<br>M00394<br>M00395<br>M00396<br>M00397<br>M00398<br>M00399<br>M00400<br>M00401<br>M00402<br>M00403<br>M00404<br>M00405<br>M00406<br>M00407<br>M00408<br>M00409<br>M00410<br>M00411<br>M00412<br>M00413<br>M00414<br>M00415<br>M00416<br>M00417<br>M00418<br>M00419<br>M00420<br>M00421<br>M00422<br>M00423<br>M00424<br>M00425<br>M00426<br>M00427<br>M00428<br>M00429<br>M00430<br>M00431<br>M00432<br>M00433<br>M00434<br>M00435<br>M00436<br>M00437<br>M00438<br>M00439<br>M00440<br>M00441<br>M00442<br>M00443<br>M00444<br>M00445<br>M00446<br>M00447<br>M00448<br>M00449<br>M00450<br>M00451<br>M00452<br>M00453<br>M00454<br>M00455<br>M00456<br>M00457<br>M00458<br>M00459<br>M00460<br>M00461<br>M00462<br>M00463<br>M00464<br>M00465<br>M00466<br>M00467<br>M00468<br>M00469<br>M00470<br>M00471<br>M00472<br>M00473<br>M00474<br>M00475<br>M00476<br>M00477<br>M00478<br>M00479<br>M00480<br>M00481<br>M00482<br>M00483<br>M00484<br>M00485<br>M00486<br>M00487<br>M00488<br>M00489<br>M00490<br>M00491<br>M00492<br>M00493<br>M00494<br>M00495<br>M00496<br>M00497<br>M00498<br>M00499<br>M00500 | Glycolysis (Embden-Meyerhof pathway), glucose => pyruvate<br>Glycolysis (Embden-Meyerhof pathway), glucose => pyruvate<br>Glycol |      |
