# Supplementary material for: Assessing biosynthetic potential of agricultural groundwater through metagenomic sequencing: A diverse anammox community dominates nitrate-rich groundwater
Source: PLoS One. 2017 Apr 6;12(4):e0174930. doi: 10.1371/journal.pone.0174930 (PMC5383146; doi:10.1371/journal.pone.0174930)
Supplement: S8 Table — (XLSX) [file pone.0174930.s013.xlsx]

## Sheet: Sheet1
bin ID	top taxonomic call	%contigs w top tax call	runner up taxonomic call	%contigs w runner up tax call	median contig coverage (RPKM)	total bin size	notes
mw5.vizbin2_01_rpkmFilt_1	archaeon GW2011_AR11	0.174	archaeon GW2011_AR3	0.13	26.8	1.6 MB
mw5.vizbin2_02_rpkmFilt_1	archaeon GW2011_AR3	0.15	archaeon GW2011_AR15	0.12	4.5	1.2 MB
mw5.vizbin2_03_rpkmFilt_1	archaeon GW2011_AR3	0.268	archaeon GW2011_AR11	0.232	10.9	1.4 MB
mw5.vizbin2_04_rpkmFilt_1	archaeon GW2011_AR11	0.322	archaeon GW2011_AR3	0.103	4.3	1.2 MB
mw5.vizbin2_05_rpkmFilt_1	archaeon GW2011_AR11	0.297	archaeon GW2011_AR3	0.112	3.3	640 KB
mw5.vizbin2_06_rpkmFilt_1	archaeon GW2011_AR16	0.169	Methanosarcina siciliae HI350	0.085	14	1.4 MB
mw5.vizbin2_07_rpkmFilt_1	archaeon GW2011_AR11	0.099	marine sediment metagenome	0.092	2.6	330 KB
mw5.vizbin2_08_rpkmFilt_1	archaeon GW2011_AR3	0.121	archaeon GW2011_AR4	0.092	2.8	470 KB
mw5.vizbin2_09_rpkmFilt_1	archaeon GW2011_AR3	0.166	archaeon GW2011_AR11	0.14	4.6	1.1 MB
mw5.vizbin2_10_rpkmFilt_1	archaeon GW2011_AR4	0.103	archaeon GW2011_AR3	0.087	4.6	1.2 MB
mw5.vizbin2_11_rpkmFilt_1	archaeon GW2011_AR11	0.151	archaeon GW2011_AR4	0.093	4	1.1 MB
mw5.vizbin2_12_rpkmFilt_2	archaeon GW2011_AR5	0.518	archaeon GW2011_AR3	0.041	4.9	860 KB
mw5.vizbin2_13_rpkmFilt_1	marine sediment metagenome	0.156	Candidatus Omnitrophus sp. SKK-01	0.053	4.5	2.6 MB
mw5.vizbin2_14_rpkmFilt_1	marine sediment metagenome	0.146	Candidatus Entotheonella sp. TSY2	0.05	2.8	1.3 MB
mw5.vizbin2_15_rpkmFilt_1	marine sediment metagenome	0.156	Dehalococcoidia bacterium SCGC AB-539-J10	0.089	2.7	910 KB
mw5.vizbin2_16_rpkmFilt_1	marine sediment metagenome	0.115	Candidatus Omnitrophus sp. SKK-01	0.086	2.3	370 KB
mw5.vizbin2_17_rpkmFilt_1	Candidatus Methylomirabilis oxyfera	0.529	cellular organisms	0.02	5.8	2.7 MB
mw5.vizbin2_18_rpkmFilt_1	Pontibacter roseus	0.031	marine sediment metagenome	0.027	2.65	550 KB
mw5.vizbin2_19_rpkmFilt_1	Kutzneria sp. 744	0.16	Pseudomonas sp. Ant30-3	0.12	5.6	88 KB
mw5.vizbin2_20_rpkmFilt_1	Parcubacteria (Uhrbacteria) bacterium GW2011_GWA2_52_8d	0.234	Uhrbacteria	0.23	3.1	720 KB
mw5.vizbin2_21_rpkmFilt_1	Opitutus terrae (strain DSM 11246 / PB90-1)	0.107	Verrucomicrobia bacterium IMCC26134	0.107	2.7	280 KB
mw5.vizbin2_22_rpkmFilt_1	Cystobacter violaceus Cb vi76	0.019	cellular organisms	0.018	2.7	1.6 MB
mw5.vizbin2_23_rpkmFilt_1	Candidatus Magnetomorum sp. HK-1	0.034	Beggiatoa sp. PS	0.034	3.4	690 KB
mw5.vizbin2_24_rpkmFilt_1	Planktothrix agardhii	0.093	Pseudoxanthomonas sp. Root630	0.056	4.1	510 KB
mw5.vizbin2_25_rpkmFilt_1	archaeon GW2011_AR9	0.24	archaeon GW2011_AR4	0.067	2.7	330 KB
mw5.vizbin2_26_rpkmFilt_1	Candidatus Omnitrophus sp. SKK-01	0.13	Candidatus Kuenenia stuttgartiensis	0.039	2.2	350 KB
mw5.vizbin2_31_rpkmFilt_1	Parcubacteria	0.181	unclassified Parcubacteria	0.129	2.3	260 KB
mw5.vizbin2_32_rpkmFilt_1	uncultured bacterium (gcode 4)	0.117	Berkelbacteria bacterium GW2011_GWE1_39_12	0.117	5	880 KB
mw5.vizbin2_33_rpkmFilt_1	Microgenomates	0.325	cellular organisms	0.225	15.2	1.1 MB
mw5.vizbin2_34_rpkmFilt_1	Parcubacteria (Yanofskybacteria) bacterium GW2011_GWA1_39_13	0.172	Parcubacteria	0.123	3.55	600 KB
mw5.vizbin2_35_rpkmFilt_1	Parcubacteria bacterium GW2011_GWA1_49_26	0.259	Parcubacteria bacterium GW2011_GWB1_43_6	0.08	3.7	500 KB
mw5.vizbin2_36_rpkmFilt_1	Parcubacteria bacterium GW2011_GWA1_49_26	0.218	Parcubacteria bacterium GW2011_GWC1_38_6	0.091	5.3	580 KB
mw5.vizbin2_37_rpkmFilt_1	unclassified Parcubacteria	0.236	Parcubacteria bacterium GW2011_GWA1_56_13	0.145	2.5	130 KB
mw5.vizbin2_38_rpkmFilt_1	unclassified Parcubacteria	0.263	Parcubacteria (Nomurabacteria) bacterium GW2011_GWB1_47_6	0.145	2.5	160 KB
mw5.vizbin2_39_rpkmFilt_1	Parcubacteria (Jorgensenbacteria) bacterium GW2011_GWA1_48_11	0.131	Parcubacteria bacterium GW2011_GWA1_59_11	0.102	11	940 KB
mw5.vizbin2_40_rpkmFilt_1	unclassified Parcubacteria	0.119	Parcubacteria (Giovannonibacteria) bacterium GW2011_GWF2_42_19	0.105	27.45	720 KB
mw5.vizbin2_41_rpkmFilt_1	Parcubacteria bacterium GW2011_GWA2_51_12	0.124	unclassified Parcubacteria	0.091	3.7	610 KB
mw5.vizbin2_42_rpkmFilt_1	Parcubacteria	0.158	unclassified Parcubacteria	0.116	3.8	650 KB
mw5.vizbin2_43_rpkmFilt_1	Parcubacteria	0.281	Parcubacteria bacterium GW2011_GWA2_44_13	0.103	4	700 KB
mw5.vizbin2_44_rpkmFilt_1	Parcubacteria bacterium GW2011_GWA2_45_30	0.629	Parcubacteria bacterium GW2011_GWA2_42_14	0.063	12.7	1.2 MB
mw5.vizbin2_45_rpkmFilt_1	Parcubacteria bacterium GW2011_GWA1_49_26	0.314	Parcubacteria bacterium GW2011_GWC1_38_6	0.093	3.3	280 KB
mw5.vizbin2_46_rpkmFilt_1	unclassified Parcubacteria	0.106	Parcubacteria	0.069	3.4	1.1 MB
mw5.vizbin2_47_rpkmFilt_1	Campbellbacteria	0.136	Parcubacteria bacterium GW2011_GWA2_44_15	0.085	2.6	120 KB
mw5.vizbin2_48_rpkmFilt_1	unclassified Parcubacteria	0.102	Parcubacteria (Azambacteria) bacterium GW2011_GWA1_44_9	0.089	7.65	1.2 MB
mw5.vizbin2_49_rpkmFilt_1	Parcubacteria bacterium GW2011_GWA2_45_30	0.268	Parcubacteria	0.227	2.8	210 KB
mw5.vizbin2_50_rpkmFilt_1	unclassified Parcubacteria	0.175	Parcubacteria (Giovannonibacteria) bacterium GW2011_GWA1_44_25	0.151	6	400 KB
mw5.vizbin2_50_rpkmFilt_2	unclassified Parcubacteria	0.177	Parcubacteria	0.109	18.6	550 KB
mw5.vizbin2_51_rpkmFilt_1	Parcubacteria	0.277	Parcubacteria bacterium GW2011_GWC1_38_6	0.106	9.1	540 KB
mw5.vizbin2_51_rpkmFilt_2	unclassified Parcubacteria	0.75	Parcubacteria bacterium GW2011_GWA2_47_12	0.25	12.45	88 KB
mw5.vizbin2_52_rpkmFilt_1	Parcubacteria	0.224	Wolfebacteria	0.106	5.5	690 KB
mw5.vizbin2_53_rpkmFilt_1	Parcubacteria bacterium GW2011_GWC2_32_10	0.3	Parcubacteria bacterium GW2011_GWA2_37_10	0.18	8.2	800 KB
mw5.vizbin2_54_rpkmFilt_1	uncultured bacterium (gcode 4)	0.776	unclassified Parcubacteria	0.023	2.8	340 KB
mw5.vizbin2_55_rpkmFilt_1	Parcubacteria (Magasanikbacteria) bacterium GW2011_GWA2_56_11	0.357	uncultured bacterium (gcode 4)	0.163	2.9	220 KB
mw5.vizbin2_56_rpkmFilt_1	uncultured bacterium (gcode 4)	0.167	Levybacteria	0.155	4	1.3 MB
mw5.vizbin2_57_rpkmFilt_1	uncultured bacterium (gcode 4)	0.109	Levybacteria	0.091	2.8	340 KB
mw5.vizbin2_58_rpkmFilt_1	uncultured bacterium (gcode 4)	0.19	Magasanikbacteria	0.19	3.2	450 KB
mw5.vizbin2_59_rpkmFilt_1	Candidatus Jettenia caeni	0.272	Candidatus Brocadia sinica JPN1	0.239	2.4	1.4 MB
mw5.vizbin2_59_rpkmFilt_2	Candidatus Jettenia caeni	0.291	Candidatus Brocadia sinica JPN1	0.184	48	1.3 MB
mw5.vizbin2_60_rpkmFilt_1	archaeon GW2011_AR5	0.181	archaeon GW2011_AR4	0.057	3.1	610 KB
mw5.vizbin2_61_rpkmFilt_1	Microgenomates (Roizmanbacteria) bacterium GW2011_GWC2_37_13	0.138	Microgenomates (Roizmanbacteria) bacterium GW2011_GWA2_36_23	0.123	3	780 KB
mw5.vizbin2_62_rpkmFilt_1	archaeon GW2011_AR9	0.139	archaeon GW2011_AR11	0.102	2.6	232 KB
mw5.vizbin2_63_rpkmFilt_1	Levybacteria	0.11	uncultured bacterium (gcode 4)	0.093	3.8	1.1 MB
mw5.vizbin2_63_rpkmFilt_2	Levybacteria	0.158	uncultured bacterium (gcode 4)	0.13	58.6	780 KB
mw5.vizbin2_64_rpkmFilt_1	Levybacteria	0.181	uncultured bacterium (gcode 4)	0.119	3.8	580 KB
mw5.vizbin2_65_rpkmFilt_1	Levybacteria	0.281	uncultured bacterium (gcode 4)	0.146	7.1	220 KB
mw5.vizbin2_66_rpkmFilt_1	Levybacteria	0.251	Bacteria	0.111	4.5	700 KB
mw5.vizbin2_67_rpkmFilt_1	Levybacteria	0.214	Bacteria	0.095	4	700 KB
mw5.vizbin2_68_rpkmFilt_1	Levybacteria	0.173	unclassified Bacteria	0.173	4.3	300 KB
mw5.vizbin2_69_rpkmFilt_1	Microgenomates (Levybacteria) bacterium GW2011_GWA1_39_11	0.107	Microgenomates	0.098	4.4	480 KB
mw5.vizbin2_69_rpkmFilt_2	Microgenomates (Levybacteria) bacterium GW2011_GWA1_39_11	0.357	Nodosilinea nodulosa	0.214	62	100 KB
mw5.vizbin2_70_rpkmFilt_1	Levybacteria	0.177	uncultured bacterium (gcode 4)	0.085	4.1	4.4 MB
mw5.vizbin2_70_rpkmFilt_2	Levybacteria	0.135	uncultured bacterium (gcode 4)	0.111	58.8	920 KB
mw5.vizbin2_71_rpkmFilt_1	Woesebacteria	0.144	Microgenomates	0.084	3.8	640 KB
mw5.vizbin2_72_rpkmFilt_1	Bacteria	0.438	Microgenomates (Daviesbacteria) bacterium GW2011_GWA2_40_9	0.054	3.4	640 KB
mw5.vizbin2_73_rpkmFilt_1	Bacteria	0.359	Daviesbacteria	0.135	3.4	360 KB
mw5.vizbin2_74_rpkmFilt_1	Bacteria	0.566	Microgenomates (Daviesbacteria) bacterium GW2011_GWA2_38_17	0.074	4.3	680 KB
mw5.vizbin2_75_rpkmFilt_1	Bacteria	0.25	cellular organisms	0.139	7	1.1 MB
mw5.vizbin2_75_rpkmFilt_2	Bacteria	0.333	uncultured bacterium (gcode 4)	0.104	13.3	840 KB
mw5.vizbin2_76_rpkmFilt_1	Bacteria	0.343	Microgenomates (Daviesbacteria) bacterium GW2011_GWA2_40_9	0.104	3.5	200 KB
mw5.vizbin2_76_rpkmFilt_2	Bacteria	0.509	Microgenomates (Daviesbacteria) bacterium GW2011_GWC2_40_12	0.16	6.75	960 KB
mw5.vizbin2_77_rpkmFilt_1	Bacteria	0.34	Microgenomates (Daviesbacteria) bacterium GW2011_GWC2_40_12	0.09	5.6	880 KB
mw5.vizbin2_78_rpkmFilt_1	Bacteria	0.409	Microgenomates (Daviesbacteria) bacterium GW2011_GWC2_40_12	0.069	4	5.3 MB
mw5.vizbin2_79_rpkmFilt_2	Bacteria	0.347	Microgenomates (Daviesbacteria) bacterium GW2011_GWC2_40_12	0.072	89.1	8.0 KB
mw5.vizbin2_80_rpkmFilt_1	Bacteria	0.326	Microgenomates (Daviesbacteria) bacterium GW2011_GWC2_40_12	0.094	3.8	2.1 MB
mw5.vizbin2_81_rpkmFilt_1	Bacteria	0.482	cellular organisms	0.134	3.7	340 KB
mw5.vizbin2_81_rpkmFilt_2	uncultured bacterium (gcode 4)	0.095	Clostridium sp. CAG:306	0.042	9.9	1.9 MB
